# Supplementary material for: Synthesis of Co-based bimetallic nanocrystals with one-dimensional structure for selective control on syngas conversion
Source: Royal Society of Chemistry journal article supplement (doi:10.1039/c5nr02222c), 2015-01-01
Supplement: c5nr02222c1.pdf [file c5nr02222c1.pdf]

### Supporting Information

## Synthesis of Co-based bimetallic nanocrystals with one-dimensional structure for selective control on syngas conversion

Rongbin Ba,<sup>a,b</sup> Yonghui Zhao,<sup>a</sup> Lujing Yu,<sup>a,b</sup> Jianjun Song,<sup>a,b</sup> Shuangshuang Huang,<sup>a,b</sup>

Liangshu Zhong,<sup>a</sup> Yuhan Sun,<sup>\*,a,c</sup> and Yan Zhu<sup>\*,a,c</sup>

<sup>a</sup> CAS Key Laboratory of Low-Carbon Conversion Science and Engineering, Shanghai Advanced Research Institute, Chinese Academy of Sciences, Shanghai 201210, China

<sup>b</sup> University of Chinese Academy of Sciences, Beijing, 100049, China

<sup>c</sup> School of Physical Science and Technology, ShanghaiTech University, Shanghai 201210, China

### Supporting Figures

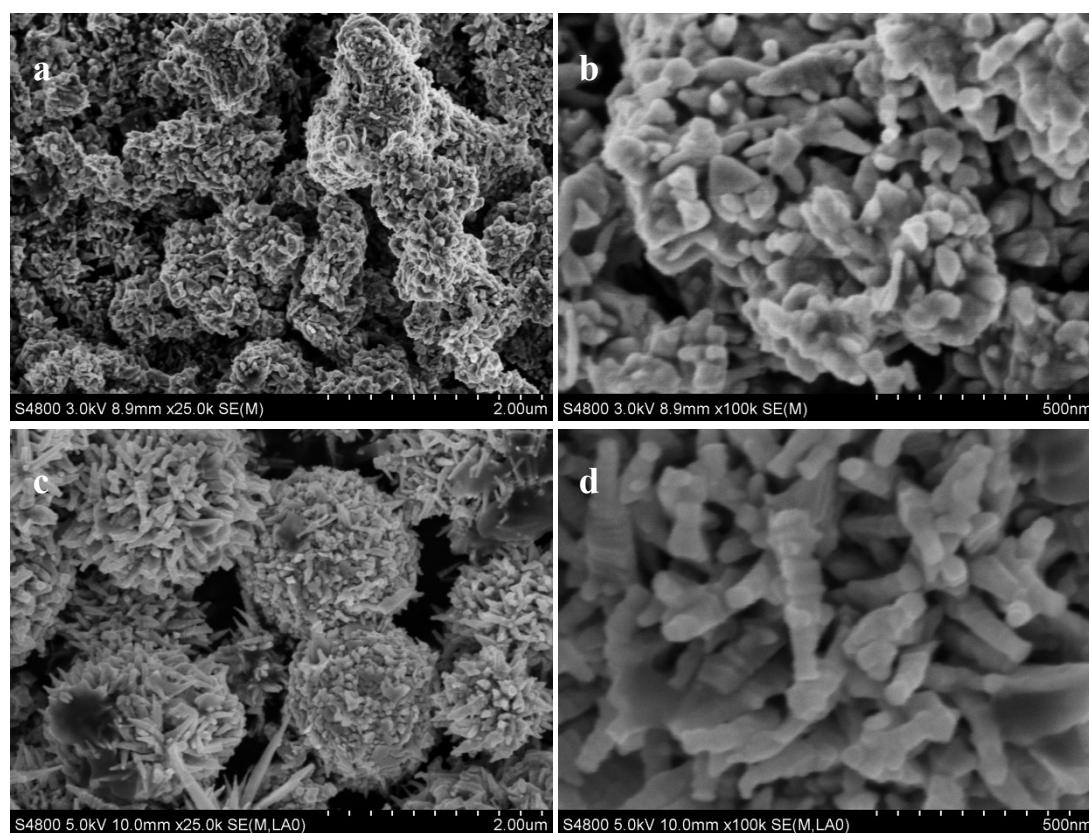

**Figure S1.** (a) and (b) SEM images of Co nanocrystals synthesized in propylene glycol solvent with stearic acid as a surfactant at 190°C for 5h without Pd as seeds. (c) and (d) SEM images of

Co nanocrystals synthesized in propylene glycol solvent with stearic acid and hexadecylamine as double surfactants at 160°C for 15h without Cu as seeds.

No introducing surfactant in the synthesis route, there are no slim peripheral branches of Co-Pd particles, and big lumps onto the shell surface can be found (Figure S2a). The optimum concentration of stearic acid should be 0.05 mol/L, and the rod-like branches are much slim in contrast to high or low content of stearic acid (Figure S2b-e). Besides stearic acid as a surfactant to promote the whisker growth of Co-Pd, oleic acid can also play a similar role on assisting one-sided growth of Co-based nanocrystals (Figure S2f). Next, the structure and component of Co-Pd bimetal are related with the reaction time and reaction temperature. If the reaction time was more than 5 h, the length of peripheral branches would become shorter (Figure S3c). Reaction temperatures also need taking into account for controlling the shape of Co-Pd nanocrystals, where the optimum temperature was 190°C. When reaction temperature was lower than 190°C, with the temperature decrease, peripheral branches became short, while the reaction temperature was higher than 190°C such as 210°C for 5h, peripheral branches were short (Figure S3a, b, and d). Figure S3e-j show the shape evolution of Co-Pd nanocrystals at different stage. When the synthesis was conducted for 1h, cobalt stearate was formed ( $2\theta=21.5^\circ$ ) and no CoPd nanocrystal was formed, as shown in Figure S4. Carboxyl is electrophilic group which can provide electron cloud to  $\text{Co}^{2+}$  to form coordinate bond, leading to the decrease of  $\text{Co}^{2+}$  in the solution. When the reaction proceed to 2h, CoPd nanocrystals started to form and the cobalt stearate started to consume, which was coincident with the diffraction peaks at 2h. When the reaction time was up to 3h, the cobalt nearly exhausted and most of CoPd nanocrystals formed although their construction were not uniform. Until to 3.5h, the cobalt stearate were completely consumed, indicated by XRD studied.

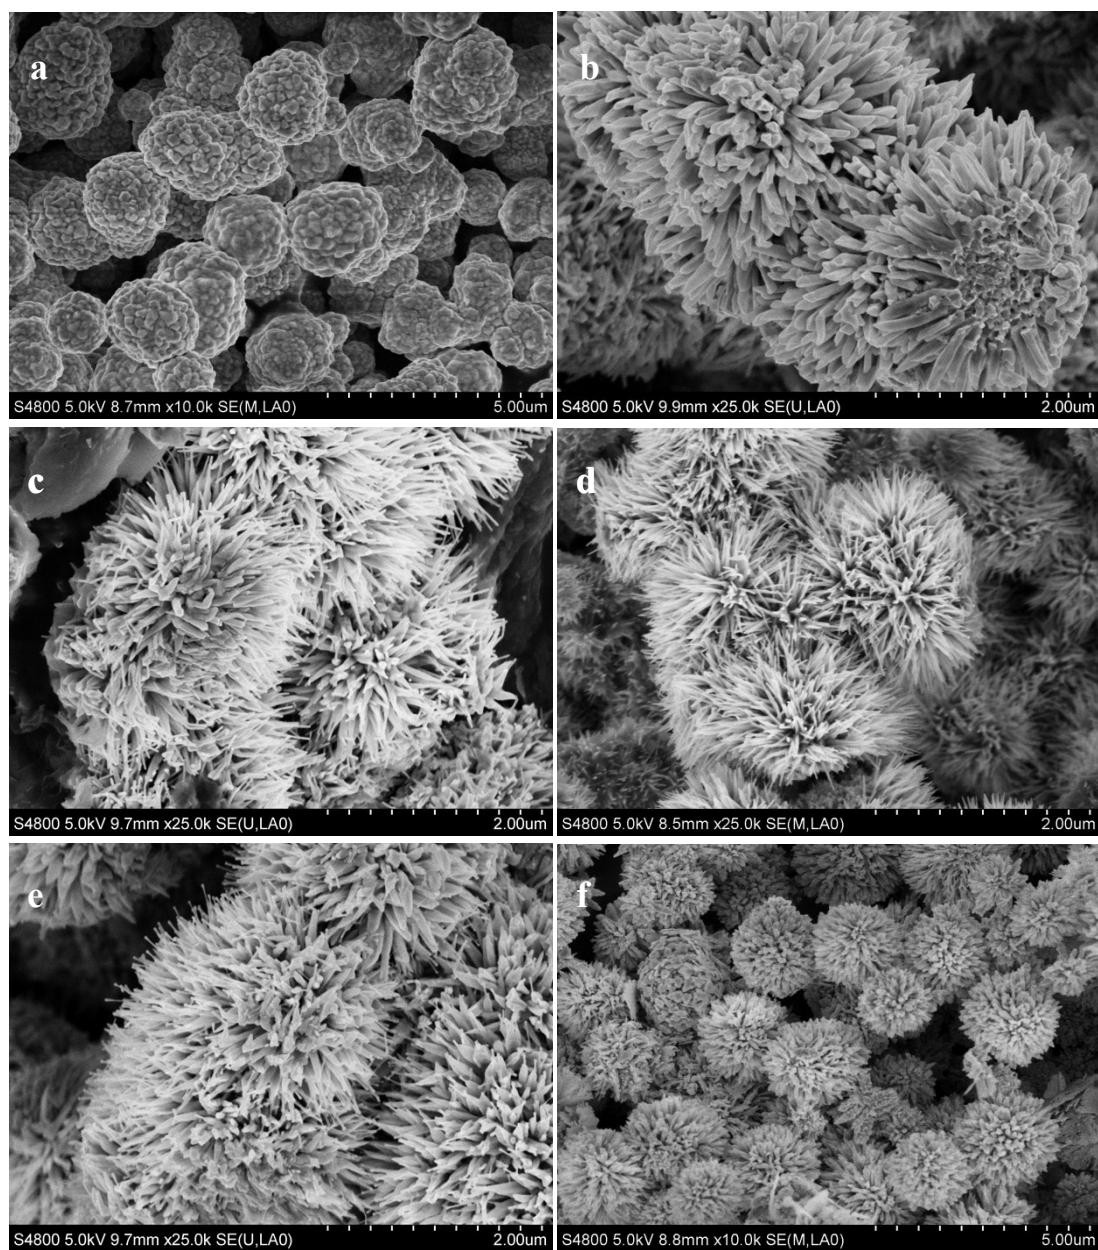

**Figure S2.** SEM images of CoPd<sub>0.001</sub> nanocrystals synthesized at 190°C (a) without surfactants, (b) 0.0125 mol/L stearic acid, (c) 0.025 mol/L stearic acid, (d) 0.05 mol/L stearic acid, (e) 0.1 mol/L stearic acid, and (f) using 0.05 mol/L oleic acid as a surfactant, respectively.

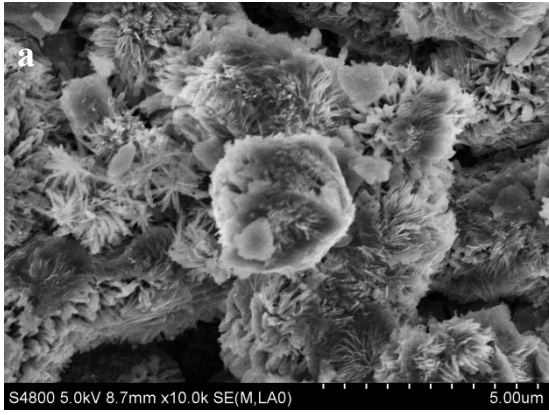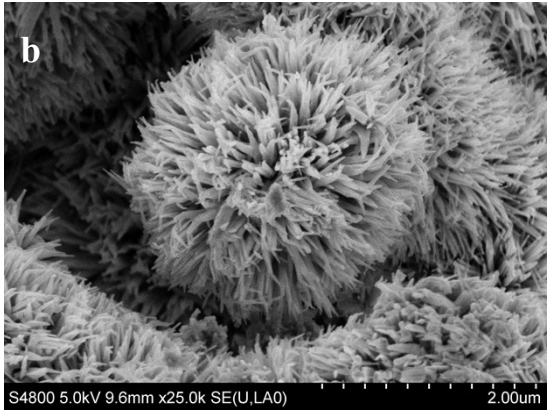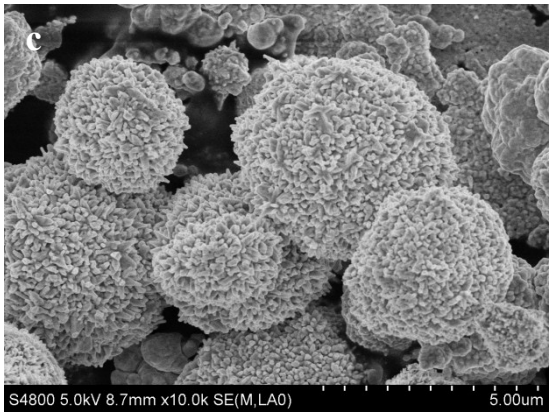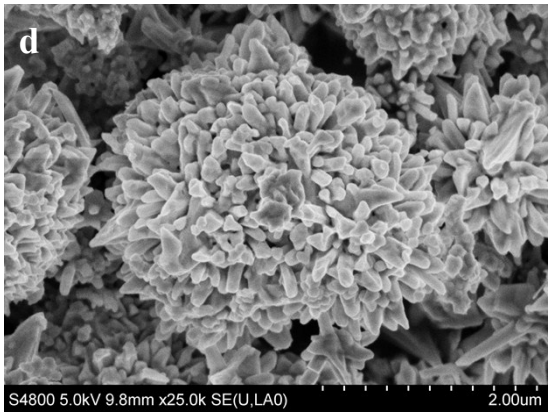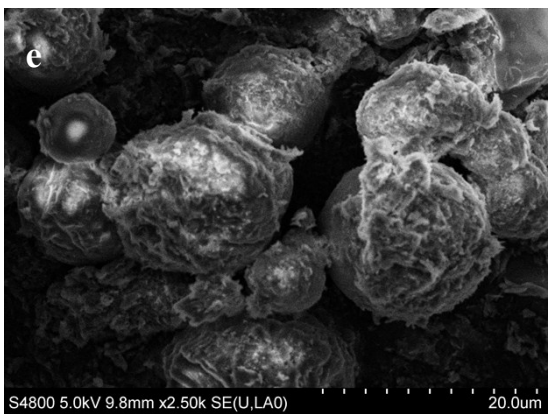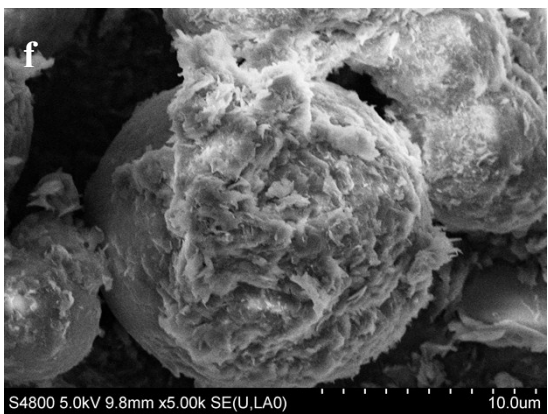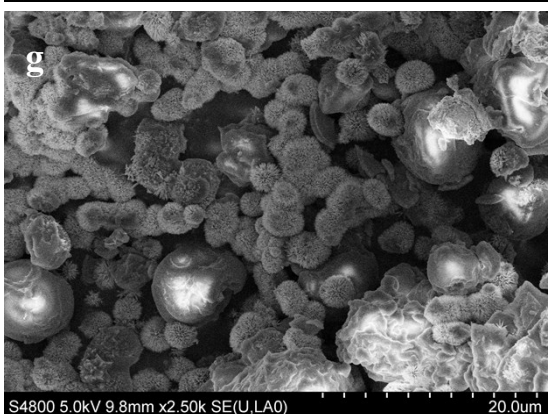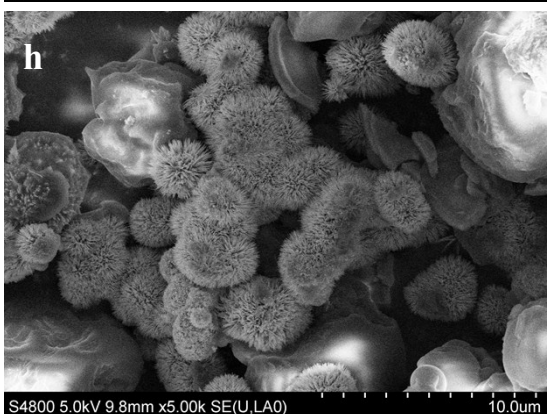

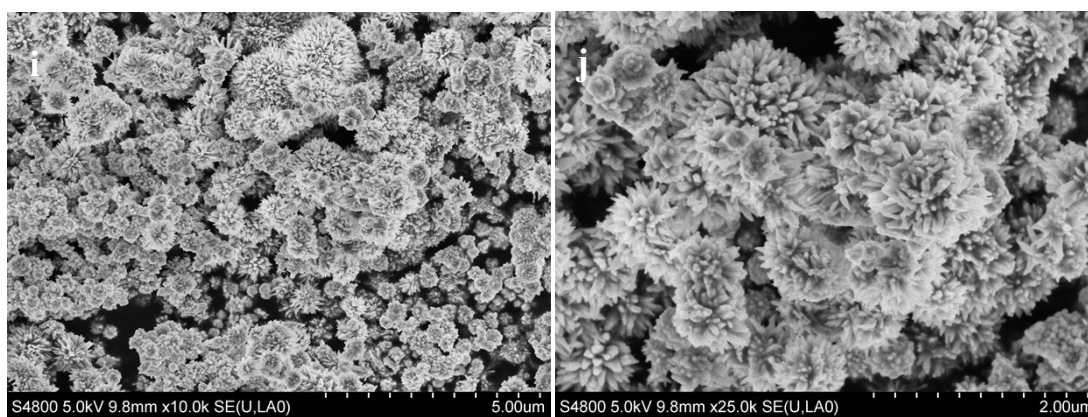

**Figure S3.** (a) SEM image of  $\text{CoPd}_{0.001}$  nanocrystals synthesized at  $150^\circ\text{C}$  for 5h. (b) SEM image of  $\text{CoPd}_{0.001}$  nanocrystals synthesized at  $170^\circ\text{C}$  for 5h. (c) SEM image of  $\text{CoPd}_{0.001}$  nanocrystals synthesized at  $190^\circ\text{C}$  for 15h. (d) SEM image of  $\text{CoPd}_{0.001}$  nanocrystals synthesized at  $210^\circ\text{C}$  for 5h. SEM image of  $\text{CoPd}_{0.001}$  nanocrystals synthesized at  $190^\circ\text{C}$  for (e, f) 1h, (g, h) 2h, and (i, j) 3h, respectively.

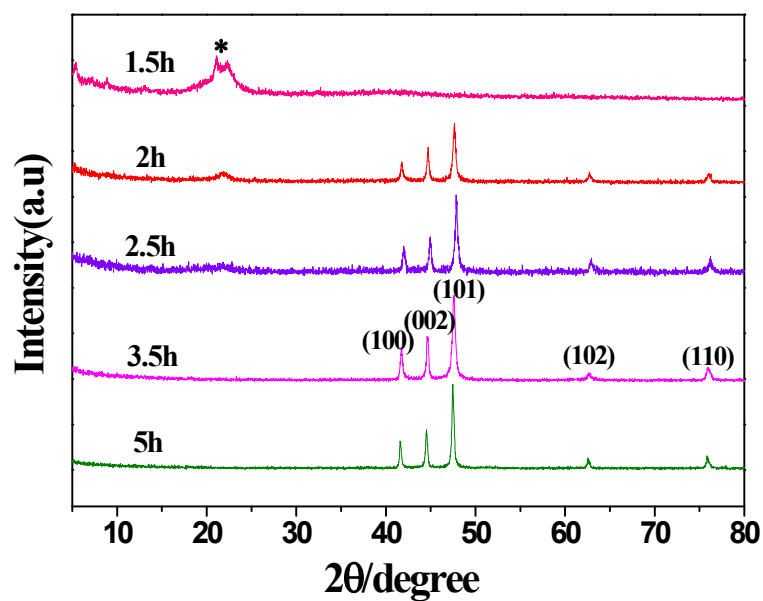

**Figure S4.** XRD patterns of Co-based (Co-Pd) nanocrystals synthesized at  $190^\circ\text{C}$  for different reaction time (asterisk for cobalt stearate).



Long-chain carboxylic acid and long-chain amine such as stearic acid and hexadecylamine as a pair of ligands play a key role on shaping the dendrite-like structure of Co-Cu bimetallic nanocrystals. If only stearic acid was used as a surfactant, although the 3D core-shell structure of Co-Cu can be also obtained, the size of core is larger than 500 nm and the rod-like branches on the shell are too short. With the increase of Cu content, the length of peripheral branches got shorter and solid core became larger (Figure S5a-c). Especially, the length of rods of  $\text{CoCu}_{0.2}$  (20wt% Cu) is nearly negligible and the cores are up to micrometer scale (Figure S5d). If only hexadecylamine was used as a surfactant, the cores are also large and the nanorods are short, confirmed by SEM studies of  $\text{CoCu}_{0.05}$  and  $\text{CoCu}_{0.1}$  (Figure S5e-f).

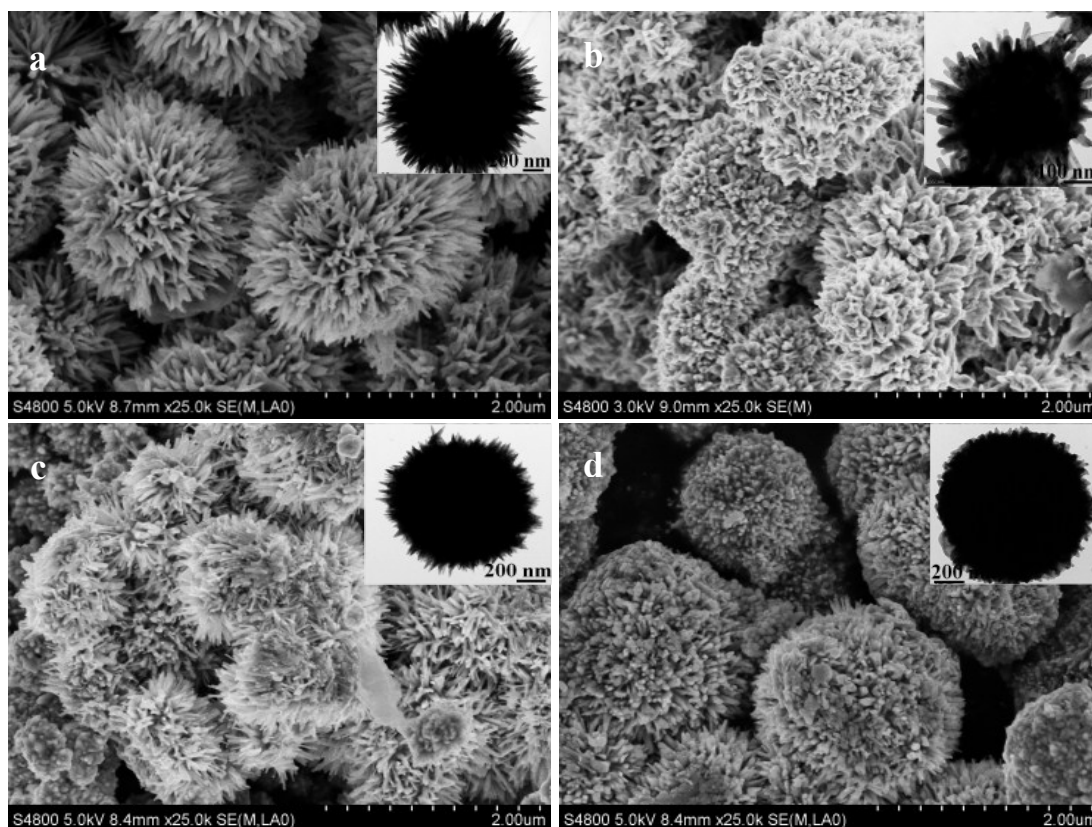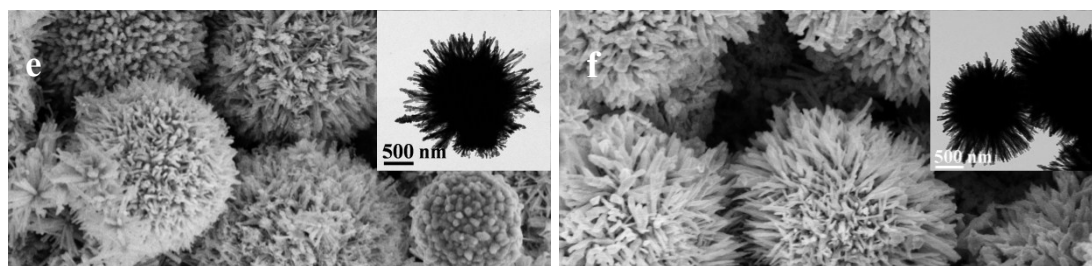

**Figure S5.** SEM images of (a)  $\text{CoCu}_{0.01}$ , (b)  $\text{CoCu}_{0.05}$ , (c)  $\text{CoCu}_{0.1}$  and (d)  $\text{CoCu}_{0.2}$ . These samples were synthesized in the propylene glycol solvent at  $190^\circ\text{C}$  for 5 h using stearic acid as a surfactant. SEM images of (e)  $\text{CoCu}_{0.05}$  and (f)  $\text{CoCu}_{0.1}$  synthesized in propylene glycol solvent at  $190^\circ\text{C}$  for 5 h using hexadecylamine as a surfactant. Insets are TEM images of corresponding Co-Cu samples.

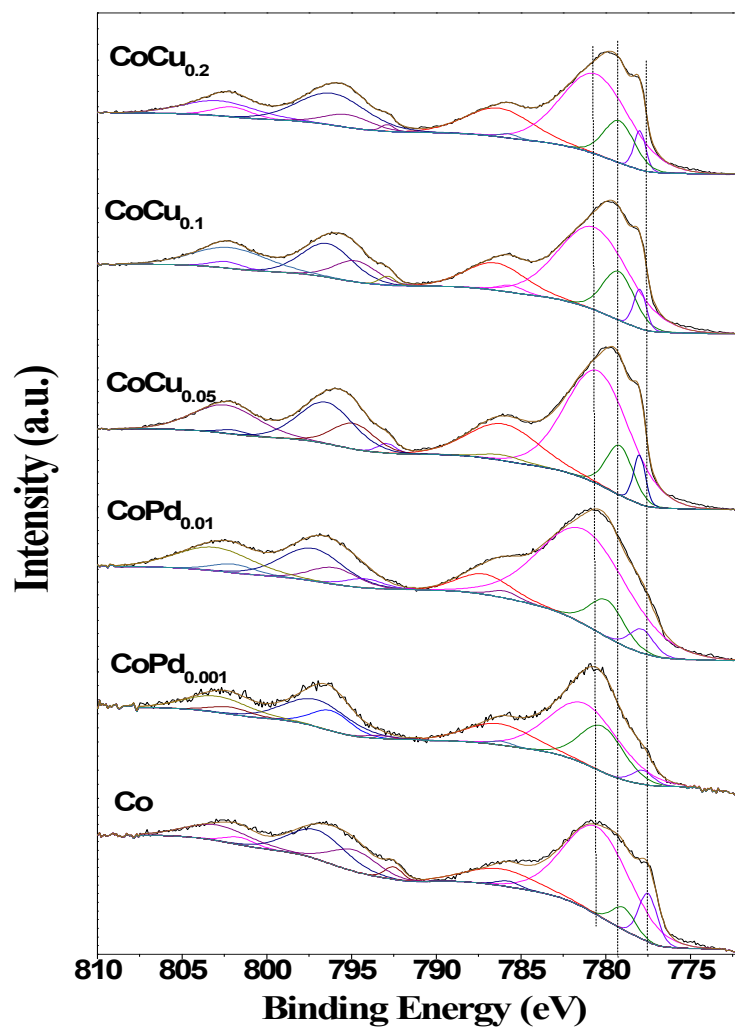

**Figure S6.** Co 2p electron region of XPS spectra of  $\text{CoPd}_{0.001}$ ,  $\text{CoPd}_{0.01}$ ,  $\text{CoCu}_{0.05}$ ,  $\text{CoCu}_{0.1}$ , and  $\text{CoCu}_{0.2}$  nanocrystals.



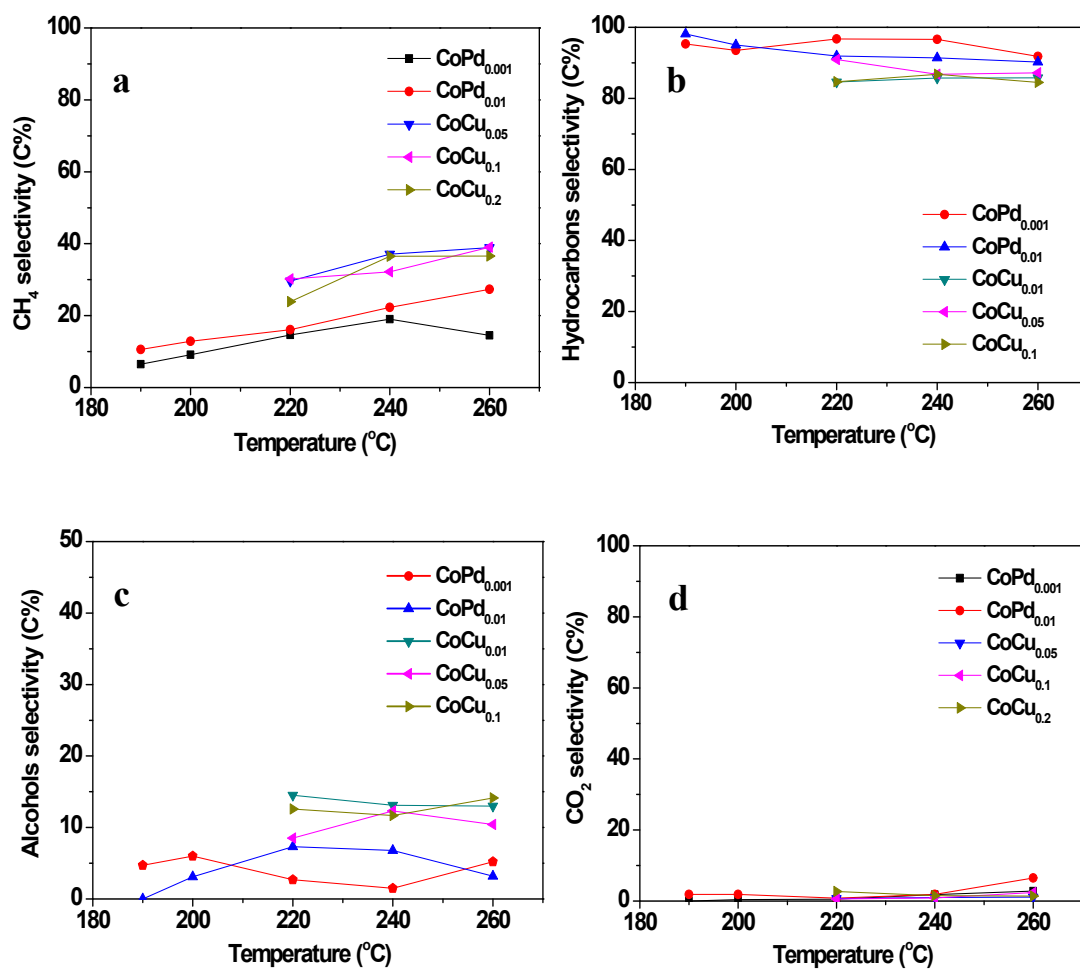

**Figure S7.** Catalytic performances of Co-Pd and Co-Cu nanocrystals with 1D structure for syngas conversion: (a) CH<sub>4</sub> selectivity, (b) hydrocarbons selectivity, (c) alcohols selectivity and (d) CO<sub>2</sub> selectivity, respectively.

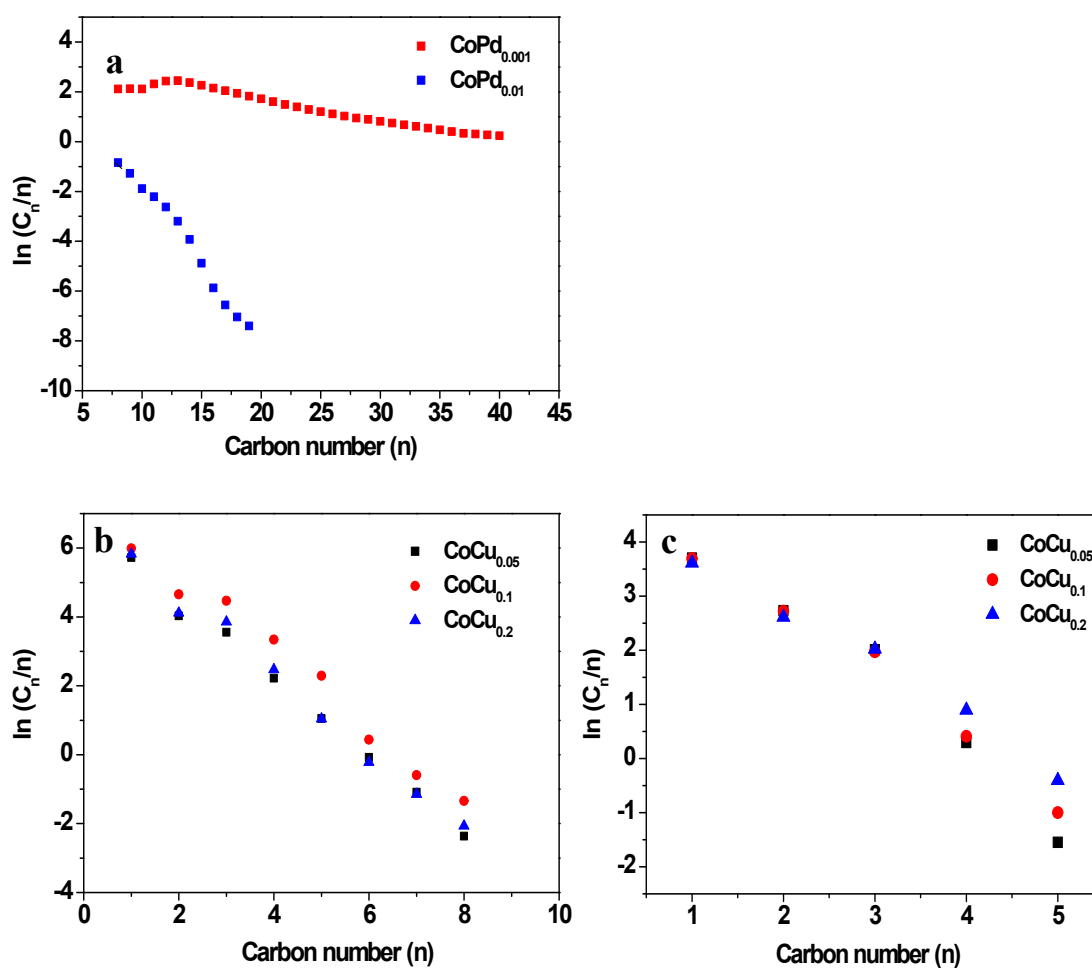

**Figure S8.** ASF plots based on distribution of hydrocarbons collected at 220°C and 6 MPa over (a) Co-Pd and (b) Co-Cu catalysts. (c) ASF plots based on distribution of alcohols collected at 220°C and 6 MPa over Co-Cu catalysts. ( $C_n$  is the carbon molar fraction of the product with carbon number equal to n.  $C_1$ - $C_7$  products were collected in water phase and  $C_n$  ( $n > 7$ ) products were collected in the wax and oil phases.) The values of ASF for products chain-lengthening

probabilities were calculated according to the following Equation:  $C_n / n = \alpha^{n-1} (1 - \alpha)^2$

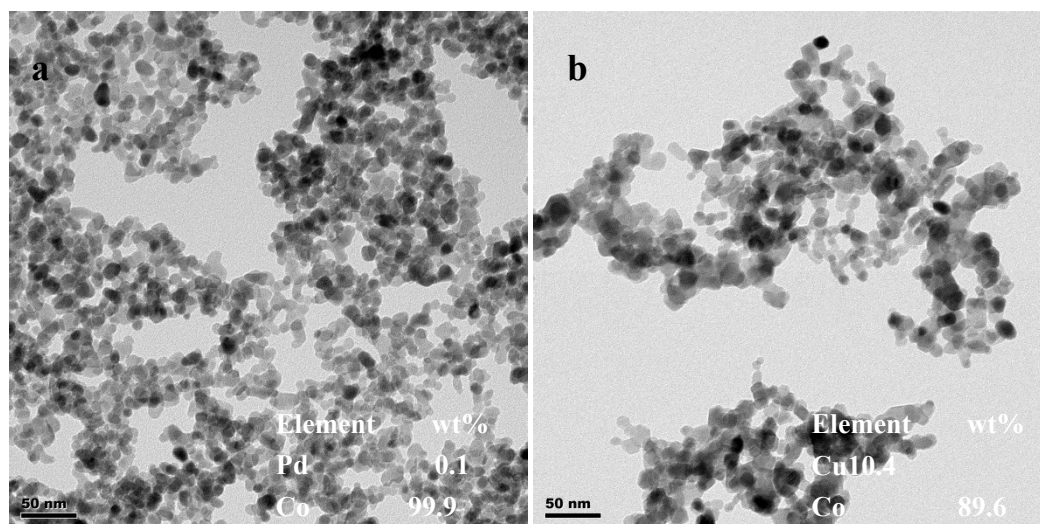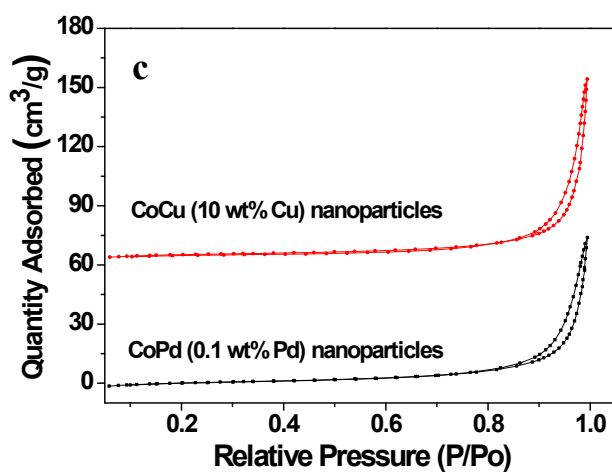

**Figure S9.** TEM images and corresponding ICP analysis of (a) CoPd (0.1wt% Pd) and (b) CoCu (10wt% Cu) nanoparticles prepared using the coprecipitation methods. (c) N<sub>2</sub> absorption isotherms of CoPd (0.1wt% Pd) and CoCu (10wt% Cu) nanoparticles prepared using the coprecipitation methods.

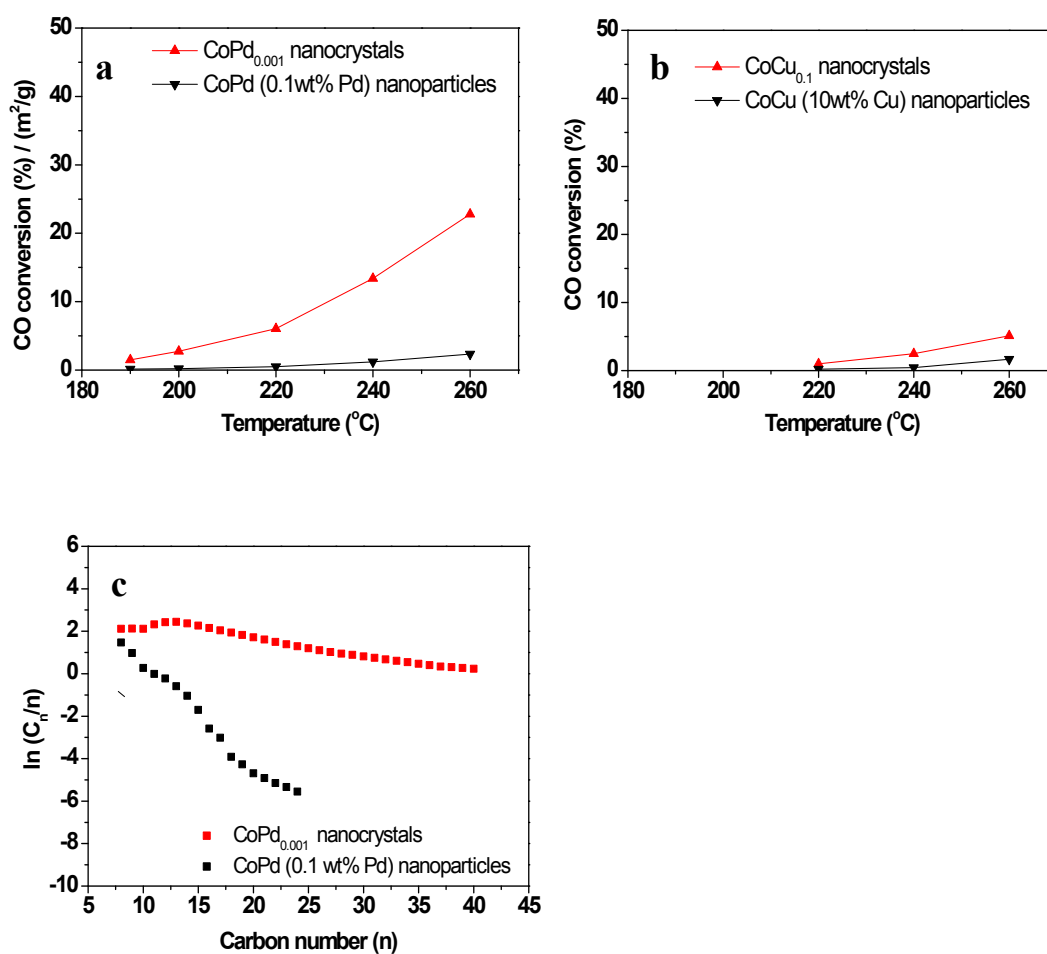

**Figure S10.** (a) Comparison of catalytic activity per unit surface area of CoPd<sub>0.001</sub> nanocrystals and CoPd (0.1wt% Pd) nanoparticles. (b) Comparison of catalytic activity per unit surface area of CoCu<sub>0.1</sub> nanocrystals and CoCu (10wt% Cu) nanoparticles. (c) ASF plots based on distribution of hydrocarbons collected at 220°C and 6 MPa over CoPd<sub>0.001</sub> nanocrystals and CoPd (0.1wt% Pd) nanoparticles. (These nanoparticles were prepared via coprecipitation methods.)

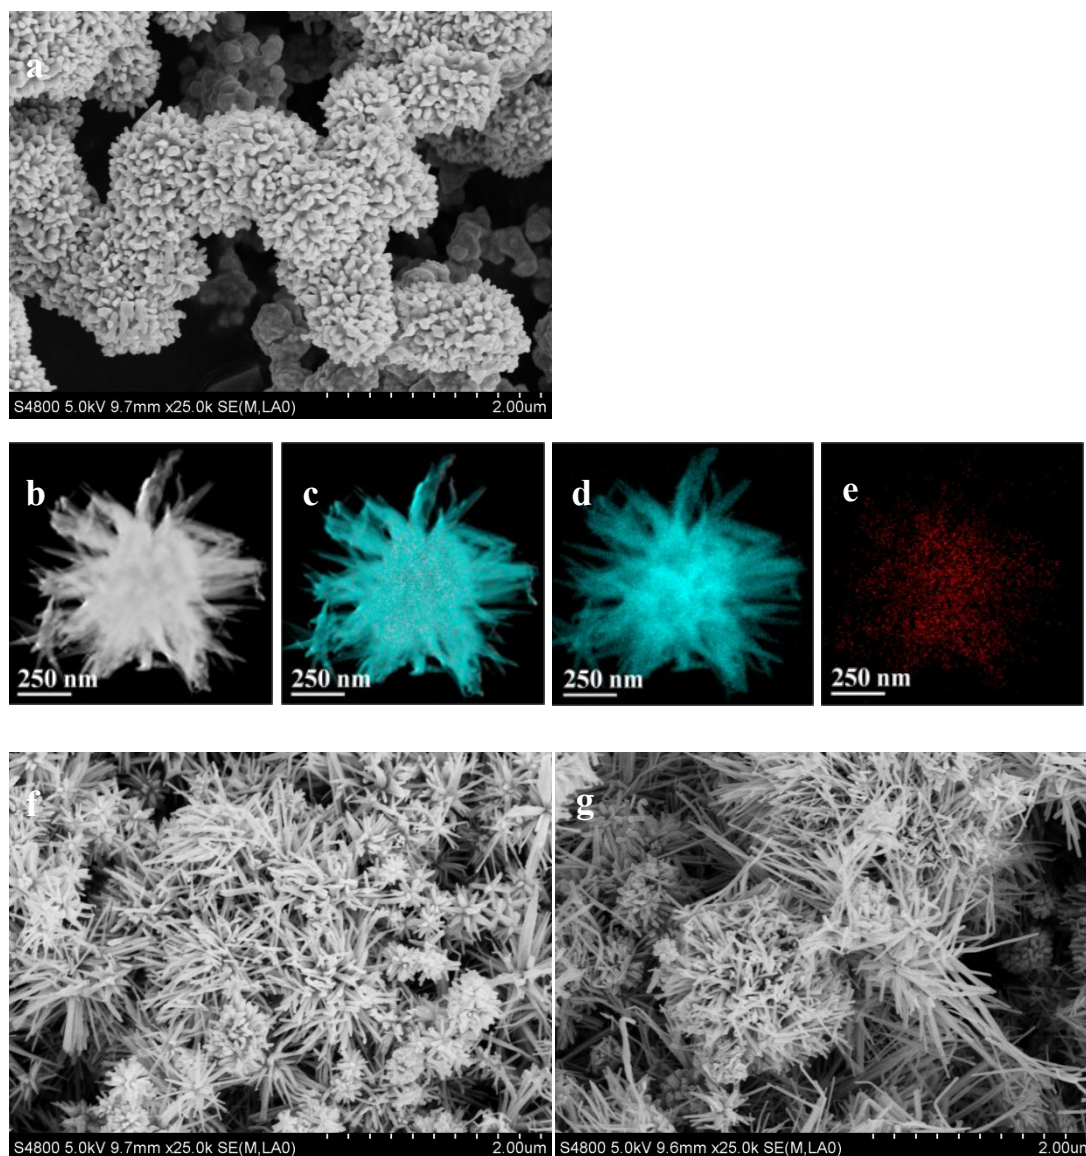

**Figure S11.** (a) SEM image of CoPd<sub>0.01</sub>, (b) Bright-field TEM image of CoPd<sub>0.01</sub>, and (c-e) the corresponding element maps of Co (blue) and Pd (red) in CoPd<sub>0.01</sub> after catalytic tests (220°C, 6MP, 24 hr). SEM images of (f) CoCu<sub>0.05</sub> and (g) CoCu<sub>0.2</sub> catalysts after catalytic tests (220°C, 6MP, 24 hr).

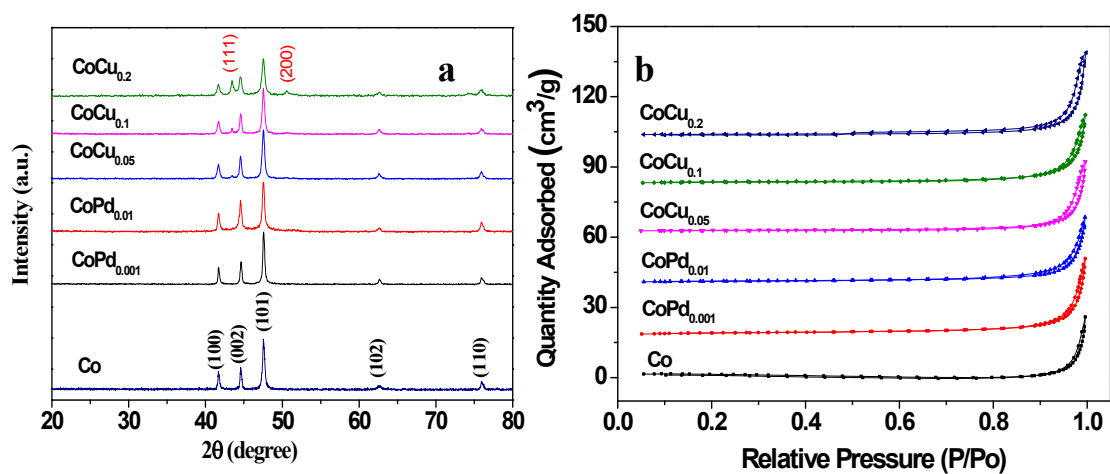

**Figure S12.** (a) XRD patterns and (b)  $\text{N}_2$  adsorption isotherms of Co-based nanocrystals after catalytic tests ( $220^\circ\text{C}$ , 6MP, 24 hr).

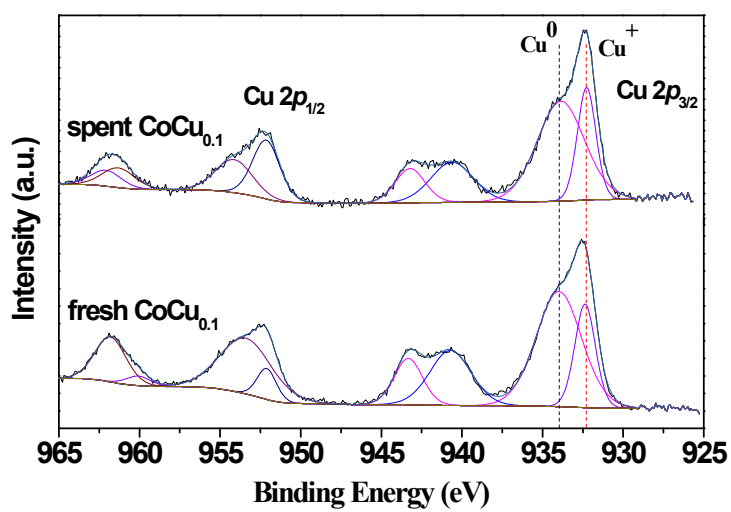

**Figure S13.** Cu 2p electron region of XPS profiles of fresh and spent  $\text{CoCu}_{0.1}$ .



## 1. Supporting Tables

**Table S1.** The exact chemical compositions of Co-Pd and Co-Cu nanocrystals (including fresh and spent ones) were determined by ICP. The surface compositions of Co-Pd and Co-Cu nanocrystals (including fresh and spent ones) were determined by XPS.

| Sample                      | Pd or Cu (wt%) by ICP | Pd or Cu (wt%) by XPS |
|-----------------------------|-----------------------|-----------------------|
| fresh CoPd <sub>0.001</sub> | 0.1                   | 1.1                   |
| fresh CoPd <sub>0.01</sub>  | 0.9                   | 5.3                   |
| fresh CoCu <sub>0.05</sub>  | 5.1                   | 26.3                  |
| fresh CoCu <sub>0.1</sub>   | 9.2                   | 27.6                  |
| fresh CoCu <sub>0.2</sub>   | 19.6                  | 29.8                  |
| spent CoPd <sub>0.001</sub> | 0.1                   | 0.9                   |
| spent CoPd <sub>0.01</sub>  | 1.0                   | 2.7                   |
| spent CoCu <sub>0.05</sub>  | 5.3                   | 7.9                   |
| spent CoCu <sub>0.1</sub>   | 10.7                  | 6.9                   |
| spent CoCu <sub>0.2</sub>   | 20.3                  | 9.5                   |

**Table S2.** Surface areas of fresh and spent Co-based bimetallic catalysts detected by N<sub>2</sub> sorption isotherms<sup>[a]</sup>.

| Sample                      | S <sub>BET</sub> (m <sup>2</sup> /g) |
|-----------------------------|--------------------------------------|
| fresh CoPd <sub>0.001</sub> | 2.3                                  |
| fresh CoPd <sub>0.01</sub>  | 1.7                                  |
| fresh CoCu <sub>0.05</sub>  | 7.6                                  |
| fresh CoCu <sub>0.1</sub>   | 10.7                                 |
| fresh CoCu <sub>0.2</sub>   | 7.1                                  |
| fresh CoPd <sup>[b]</sup>   | 17.6                                 |
| fresh CoCu <sup>[b]</sup>   | 15.7                                 |
| spent CoPd <sub>0.001</sub> | 2.7                                  |
| spent CoPd <sub>0.01</sub>  | 1.9                                  |
| spent CoCu <sub>0.05</sub>  | 6.1                                  |
| spent CoCu <sub>0.1</sub>   | 5.7                                  |
| spent CoCu <sub>0.2</sub>   | 4.6                                  |

[a] surface area: BET method; [b] catalyst preparation: coprecipitation methods.

**Table S3.** Catalytic result of CoPd<sub>0.001</sub> nanocrystals for syngas conversion

| Temp..<br>(°C) | CO Conv.<br>(%) | CH <sub>4</sub> Sel.<br>(C%) | C <sub>2+</sub> Sel.<br>(C%) | C <sub>5+</sub> Sel.<br>(C%) |
|----------------|-----------------|------------------------------|------------------------------|------------------------------|
| 190            | 8.8             | 6.5                          | 88.8                         | 78.42                        |
| 200            | 11.6            | 9.1                          | 84.7                         | 74.61                        |
| 220            | 22.4            | 14.6                         | 82.2                         | 69.58                        |
| 240            | 43.5            | 19.0                         | 77.64                        | 57.85                        |
| 260            | 71.2            | 14.5                         | 77.5                         | 66.4                         |

| T/°C | Selectivity(C %) |      |                 | ROH distribution(wt%) |      |      |      |                    | RH distribution(wt%) |                |                |                |                 |
|------|------------------|------|-----------------|-----------------------|------|------|------|--------------------|----------------------|----------------|----------------|----------------|-----------------|
|      | ROH              | RH   | CO <sub>2</sub> | MeOH                  | EtOH | PrOH | BuOH | C <sub>5+</sub> OH | C <sub>1</sub>       | C <sub>2</sub> | C <sub>3</sub> | C <sub>4</sub> | C <sub>5+</sub> |
| 190  | 4.7              | 95.3 | 0               | 19.1                  | 15.8 | 10.0 | 17.8 | 37.0               | 11.4                 | 3.1            | 7.2            | 6.0            | 72.2            |
| 200  | 6.0              | 93.5 | 0.4             | 19.4                  | 13.0 | 7.4  | 6.6  | 53.4               | 21.6                 | 4.5            | 9.4            | 7.7            | 56.6            |
| 220  | 2.7              | 96.7 | 0.5             | 30.5                  | 13.8 | 6.6  | 4.0  | 45.0               | 11.3                 | 3.1            | 7.1            | 5.9            | 72.4            |
| 240  | 1.5              | 96.6 | 1.8             | 38.8                  | 16.8 | 18.1 | 2.5  | 23.6               | 25.4                 | 6.4            | 10.0           | 7.6            | 50.4            |
| 260  | 5.2              | 91.8 | 2.8             | 31.6                  | 20.1 | 7.5  | 12.0 | 28.2               | 19.0                 | 4.5            | 5.49           | 3.3            | 67.5            |

**Table S4.** Catalytic result of CoPd<sub>0.01</sub> nanocrystals for syngas conversion

| Temp..<br>(°C) | CO Conv.<br>(%) | CH <sub>4</sub> Sel.<br>(C%) | C <sub>2+</sub> Sel.<br>(C%) | C <sub>5+</sub> Sel.<br>(C%) |
|----------------|-----------------|------------------------------|------------------------------|------------------------------|
| 190            | 3.4             | 10.6                         | 87.5                         | 72.9                         |
| 200            | 6.3             | 12.9                         | 82.1                         | 64.9                         |
| 220            | 13.9            | 16.1                         | 75.8                         | 54.6                         |
| 240            | 30.8            | 22.3                         | 69.1                         | 48.1                         |
| 260            | 52.4            | 27.3                         | 62.9                         | 45.1                         |

| T/°C | Selectivity(C %) |      |                 | ROH distribution(wt%) |       |       |       |                    | RH distribution(wt%) |                |                |                |                 |
|------|------------------|------|-----------------|-----------------------|-------|-------|-------|--------------------|----------------------|----------------|----------------|----------------|-----------------|
|      | ROH              | RH   | CO <sub>2</sub> | MeOH                  | EtOH  | PrOH  | BuOH  | C <sub>5+</sub> OH | C <sub>1</sub>       | C <sub>2</sub> | C <sub>3</sub> | C <sub>4</sub> | C <sub>5+</sub> |
| 190  | trace            | 98.1 | 1.9             | trace                 | trace | trace | trace | trace              | 34.6                 | 11.4           | 19.1           | 12.2           | 22.7            |
| 200  | 3.1              | 95.0 | 1.9             | 67.1                  | 15.8  | 9.5   | 5.9   | 1.7                | 36.5                 | 11.9           | 19.5           | 12.3           | 19.7            |
| 220  | 7.3              | 91.9 | 0.8             | 64.0                  | 18.2  | 6.2   | 4.3   | 7.3                | 31.8                 | 10.3           | 16.2           | 11.6           | 29.9            |
| 240  | 6.8              | 91.4 | 1.9             | 68.3                  | 17.2  | 5.6   | 3.6   | 5.29               | 68.3                 | 17.2           | 5.6            | 3.6            | 1.9             |
| 260  | 3.2              | 90.2 | 6.5             | 74.1                  | 17.8  | 5.1   | 2.5   | 0.5                | 74.1                 | 17.8           | 5.1            | 2.5            | 0.5             |

**Table S5.** Catalytic result of CoCu<sub>0.05</sub> nanocrystals for syngas conversion

| Temp..<br>(°C) | CO Conv.<br>(%) | CH <sub>4</sub> Sel.<br>(C%) | C <sub>2+</sub> Sel.<br>(C%) | C <sub>5+</sub> Sel.<br>(C%) |
|----------------|-----------------|------------------------------|------------------------------|------------------------------|
| 220            | 4.7             | 29.6                         | 55                           | 29.9                         |
| 240            | 9.8             | 37.1                         | 48.6                         | 14.2                         |
| 260            | 29.4            | 38.9                         | 46.9                         | 5.7                          |

| T/°C | Selectivity(C %) |      |                 | ROH distribution(wt%) |      |      |      |                    | RH distribution(wt%) |                |                |                |                 |
|------|------------------|------|-----------------|-----------------------|------|------|------|--------------------|----------------------|----------------|----------------|----------------|-----------------|
|      | ROH              | RH   | CO <sub>2</sub> | MeOH                  | EtOH | PrOH | BuOH | C <sub>5+</sub> OH | C <sub>1</sub>       | C <sub>2</sub> | C <sub>3</sub> | C <sub>4</sub> | C <sub>5+</sub> |
| 220  | 14.5             | 84.6 | 0.7             | 49.7                  | 26.9 | 18.5 | 4.4  | 0.5                | 54.1                 | 18.8           | 17.7           | 6.1            | 3.4             |
| 240  | 13.1             | 85.7 | 1               | 47.1                  | 26.9 | 19.3 | 5.4  | 1.2                | 52.9                 | 20.2           | 18.2           | 6.8            | 1.9             |
| 260  | 13               | 85.8 | 1.1             | 47.6                  | 26.7 | 19.2 | 5.3  | 1.2                | 47.7                 | 17.5           | 17.5           | 11.<br>2       | 6.1             |

**Table S6.** Catalytic result of CoCu<sub>0.1</sub> nanocrystals for syngas conversion

| Temp.<br>(°C) | CO Conv.<br>(%) | CH <sub>4</sub> Sel.<br>(C%) | C <sub>2+</sub> Sel.<br>(C%) | C <sub>5+</sub> Sel.<br>(C%) |
|---------------|-----------------|------------------------------|------------------------------|------------------------------|
| 220           | 10.5            | 30.2                         | 60.7                         | 15.7                         |
| 240           | 26.6            | 32.2                         | 54.6                         | 9.1                          |
| 260           | 54.7            | 39                           | 48.2                         | 13.0                         |

| T/°C | Selectivity(C %) |      |                 | ROH distribution(wt%) |      |      |      |                    | RH distribution(wt%) |                |                |                |                 |
|------|------------------|------|-----------------|-----------------------|------|------|------|--------------------|----------------------|----------------|----------------|----------------|-----------------|
|      | ROH              | RH   | CO <sub>2</sub> | MeOH                  | EtOH | PrOH | BuOH | C <sub>5+</sub> OH | C <sub>1</sub>       | C <sub>2</sub> | C <sub>3</sub> | C <sub>4</sub> | C <sub>5+</sub> |
| 220  | 8.5              | 90.9 | 0.6             | 50.3                  | 27.4 | 16.8 | 2.6  | 2.9                | 40.2                 | 19.8           | 24.2           | 10.3           | 5.5             |
| 240  | 12.3             | 86.8 | 0.9             | 52.8                  | 23.9 | 14.6 | 3.6  | 5.1                | 40.0                 | 16.1           | 21.0           | 14.1           | 8.7             |
| 260  | 10.4             | 87.2 | 2.4             | 50.3                  | 23.8 | 13.4 | 6.1  | 6.5                | 48.4                 | 15.5           | 17.0           | 7.5            | 11.<br>6        |

**Table S7.** Catalytic result of CoCu<sub>0.2</sub> nanocrystals for syngas conversion

| Temp.<br>(°C) | CO Conv.<br>(%) | CH <sub>4</sub> Sel.<br>(C%) | C <sub>2+</sub> Sel.<br>(C%) | C <sub>5+</sub> Sel.<br>(C%) |
|---------------|-----------------|------------------------------|------------------------------|------------------------------|
| 220           | 3.3             | 23.9                         | 60.8                         | 50.0                         |
| 240           | 7.3             | 36.5                         | 50.3                         | 22.2                         |
| 260           | 32.1            | 36.6                         | 47.9                         | 9.6                          |

| T/°C | Selectivity(C %) |      |                 | ROH distribution(wt%) |      |      |      |                    | RH distribution(wt%) |                |                |                |                 |
|------|------------------|------|-----------------|-----------------------|------|------|------|--------------------|----------------------|----------------|----------------|----------------|-----------------|
|      | ROH              | RH   | CO <sub>2</sub> | MeOH                  | EtOH | PrOH | BuOH | C <sub>5+</sub> OH | C <sub>1</sub>       | C <sub>2</sub> | C <sub>3</sub> | C <sub>4</sub> | C <sub>5+</sub> |
| 220  | 12.6             | 84.7 | 2.7             | 46.5                  | 24.4 | 20.0 | 6.9  | 2.2                | 51.9                 | 17.6           | 19.9           | 6.6            | 4.1             |
| 240  | 11.7             | 86.8 | 1.5             | 51.9                  | 24.5 | 16.2 | 5.9  | 1.5                | 49.6                 | 17.2           | 20.7           | 8.5            | 4.0             |
| 260  | 14.1             | 84.5 | 1.4             | 48.8                  | 24.0 | 17.2 | 6.4  | 3.7                | 44.2                 | 16.9           | 20.2           | 9.9            | 8.8             |

**Table S8.** Catalytic result of Co nanocrystals for syngas conversion

| Temp.<br>(°C) | CO Conv.<br>(%) | CH <sub>4</sub> Sel.<br>(C%) | C <sub>2+</sub> Sel.<br>(C%) | C <sub>5+</sub> Sel.<br>(C%) |
|---------------|-----------------|------------------------------|------------------------------|------------------------------|
| 190           | 2.9             | 5.3                          | 94.7                         | 87.7                         |
| 200           | 3.6             | 5.3                          | 92.5                         | 83.9                         |
| 220           | 10.6            | 14.9                         | 82.0                         | 73.8                         |
| 240           | 14.6            | 22.8                         | 71.7                         | 58.9                         |

|     |      |      |      |      |
|-----|------|------|------|------|
| 260 | 25.8 | 27.6 | 67.5 | 48.8 |
|-----|------|------|------|------|

| T/°C | Selectivity(C %) |      |                 | ROH distribution(wt%) |       |       |       |                    | RH distribution(wt%) |                |                |                |                 |
|------|------------------|------|-----------------|-----------------------|-------|-------|-------|--------------------|----------------------|----------------|----------------|----------------|-----------------|
|      | ROH              | RH   | CO <sub>2</sub> | MeOH                  | EtOH  | PrOH  | BuOH  | C <sub>5+</sub> OH | C <sub>1</sub>       | C <sub>2</sub> | C <sub>3</sub> | C <sub>4</sub> | C <sub>5+</sub> |
| 190  | trace            | 100  | 0               | trace                 | trace | trace | trace | trace              | 27.6                 | 6.1            | 14.0           | 11.8           | 40.3            |
| 200  | 1.7              | 97.8 | 0.4             | 77.0                  | 10.8  | 4.7   | 5.2   | 2.0                | 29.1                 | 8.2            | 15.0           | 12.0           | 35.5            |
| 220  | 1.6              | 96.9 | 1.4             | 51.6                  | 11.2  | 4.8   | 5.5   | 26.7               | 35.3                 | 4.8            | 8.0            | 6.5            | 45.2            |
| 240  | 3.6              | 94.5 | 1.8             | 59.2                  | 14.6  | 6.3   | 5.8   | 13.9               | 39.8                 | 5.99           | 8.4            | 6.7            | 38.9            |
| 260  | 2.1              | 95.1 | 2.7             | 67.3                  | 15.5  | 4.8   | 3.6   | 8.6                | 35.6                 | 6.5            | 8.9            | 7.9            | 40.9            |

**Table S9.** Catalytic result of CoPd (0.1 wt% Pd) nanoparticles prepared using coprecipitation method for syngas conversion

| Temp. (°C) | CO Conv. (%) | CH <sub>4</sub> Sel. (C%) | C <sub>2+</sub> Sel. (C%) | C <sub>5+</sub> Sel. (C%) |
|------------|--------------|---------------------------|---------------------------|---------------------------|
| 190        | 2.6          | 3.8                       | 90.5                      | 71.0                      |
| 200        | 3.8          | 5.4                       | 89.9                      | 67.0                      |
| 220        | 8.6          | 10.3                      | 78.2                      | 50.7                      |
| 240        | 21.1         | 13.8                      | 69.8                      | 51.6                      |
| 260        | 41.4         | 19.6                      | 57.1                      | 41.3                      |

| T/°C | Selectivity(C %) |      |                 | ROH distribution(wt%) |      |      |      |                    | RH distribution(wt%) |                |                |                |                 |
|------|------------------|------|-----------------|-----------------------|------|------|------|--------------------|----------------------|----------------|----------------|----------------|-----------------|
|      | ROH              | RH   | CO <sub>2</sub> | MeOH                  | EtOH | PrOH | BuOH | C <sub>5+</sub> OH | C <sub>1</sub>       | C <sub>2</sub> | C <sub>3</sub> | C <sub>4</sub> | C <sub>5+</sub> |
| 190  | 2.0              | 94.3 | 3.7             | 39.5                  | 21.1 | 11.1 | 15.6 | 12.7               | 11.7                 | 13.5           | 25.7           | 16.9           | 32.1            |
| 200  | 1.5              | 95.3 | 3.2             | 36.2                  | 26.3 | 13.6 | 15.3 | 8.5                | 13.6                 | 12.7           | 25.1           | 18.0           | 30.6            |
| 220  | 9.9              | 88.5 | 1.7             | 28.8                  | 26.9 | 10.5 | 12.6 | 21.3               | 19.6                 | 10.6           | 21.1           | 16.0           | 32.6            |
| 240  | 12.1             | 83.6 | 4.3             | 28.2                  | 21.4 | 11.0 | 11.3 | 28.2               | 31.1                 | 8.6            | 16.6           | 13.3           | 30.3            |
| 260  | 10.3             | 76.7 | 13.0            | 10.3                  | 76.7 | 13.0 | 12.7 | 24.0               | 39.6                 | 9.2            | 15.2           | 11.7           | 24.4            |

**Table S10.** Catalytic result of CoCu (10 wt% Cu) nanoparticles prepared using coprecipitation method for syngas conversion

| Temp. (°C) | CO Conv. (%) | CH <sub>4</sub> Sel. (C%) | C <sub>2+</sub> Sel. (C%) | C <sub>5+</sub> Sel. (C%) |
|------------|--------------|---------------------------|---------------------------|---------------------------|
| 220        | 3.2          | 13.6                      | 70.6                      | 37.8                      |
| 240        | 6.8          | 21                        | 65.5                      | 20.9                      |
| 260        | 26.4         | 26.4                      | 63.3                      | 16.7                      |

| T/°C | Selectivity(C %) |      |                 | ROH distribution(wt%) |      |      |      |                    | RH distribution(wt%) |                |                |                |                 |
|------|------------------|------|-----------------|-----------------------|------|------|------|--------------------|----------------------|----------------|----------------|----------------|-----------------|
|      | ROH              | RH   | CO <sub>2</sub> | MeOH                  | EtOH | PrOH | BuOH | C <sub>5+</sub> OH | C <sub>1</sub>       | C <sub>2</sub> | C <sub>3</sub> | C <sub>4</sub> | C <sub>5+</sub> |
| 220  | 11.9             | 84.2 | 3.9             | 48.2                  | 26.1 | 19.0 | 5.1  | 1.5                | 36.4                 | 19.4           | 25.5           | 11.1           | 7.7             |
| 240  | 10.6             | 86.5 | 2.8             | 39.7                  | 30.0 | 19.6 | 8.6  | 2.1                | 35.1                 | 17.4           | 24.6           | 13.1           | 9.8             |

---

|     |     |      |     |      |      |      |     |     |      |      |      |      |      |
|-----|-----|------|-----|------|------|------|-----|-----|------|------|------|------|------|
| 260 | 8.3 | 89.7 | 2.0 | 37.6 | 26.4 | 17.6 | 8.8 | 9.5 | 34.1 | 16.1 | 23.4 | 13.9 | 12.6 |
|-----|-----|------|-----|------|------|------|-----|-----|------|------|------|------|------|

---

Note: RH: hydrocarbons; ROH: alcohols.
